# Supplementary material for: Theoretical insights into ω-alkynylfuran cycloisomerisation catalyzed by Au/CeO2(111): the role of the CeO2(111) support
Source: Royal Society of Chemistry journal article supplement (doi:10.1039/c6ra27207j), 2017-01-01
Supplement: c6ra27207j1.pdf [file c6ra27207j1.pdf]

## **Theoretical insights into the $\omega$ -alkynylfuran cycloisomerisation catalyzed by Au/CeO<sub>2</sub>(111): the role of CeO<sub>2</sub>(111) support**

Yafei Luo,<sup>a</sup> Zhongzhu Chen,<sup>a</sup> Jin Zhang,<sup>b,\*</sup> Ying Tang,<sup>a</sup> Zhigang Xu<sup>a</sup> and Dianyong Tang<sup>a,b,\*</sup>

<sup>a</sup> *International Academy of Targeted Therapeutics and Innovation, Chongqing University of Arts and Sciences, Chongqing 402160 (P.R. China).*

<sup>b</sup> *Chongqing Key Laboratory of Environmental Materials and Remediation Technologies and Research Institute for New Materials Technology, Chongqing University of Arts and Sciences, Chongqing 402160 (P.R. China).*

E-mail: Zhangjin@cqwu.edu.cn and tangdy2008@163.com

|                                                                                           |            |
|-------------------------------------------------------------------------------------------|------------|
| Optimized structures                                                                      | Page 2     |
| Potential energy profiles (Au <sub>10-11</sub> /CeO <sub>2</sub> (111))                   | Page 3-9   |
| Local density of states (LDOS, Au <sub>10-11</sub> /CeO <sub>2</sub> (111))               | Page 9-10  |
| Potential energy profiles (Au <sub>3-4</sub> /CeO <sub>2</sub> (111), Au <sub>3-4</sub> ) | Page 11-13 |
| Local density of states (LDOS, Au <sub>4</sub> /CeO <sub>2</sub> (111))                   | Page 14    |
| Adsorption energy                                                                         | Page 15    |
| The local density of states (LDOS, Au <sub>3-4</sub> without CeO <sub>2</sub> (111))      | Page 16    |
| Mulliken charges                                                                          | Page 17    |

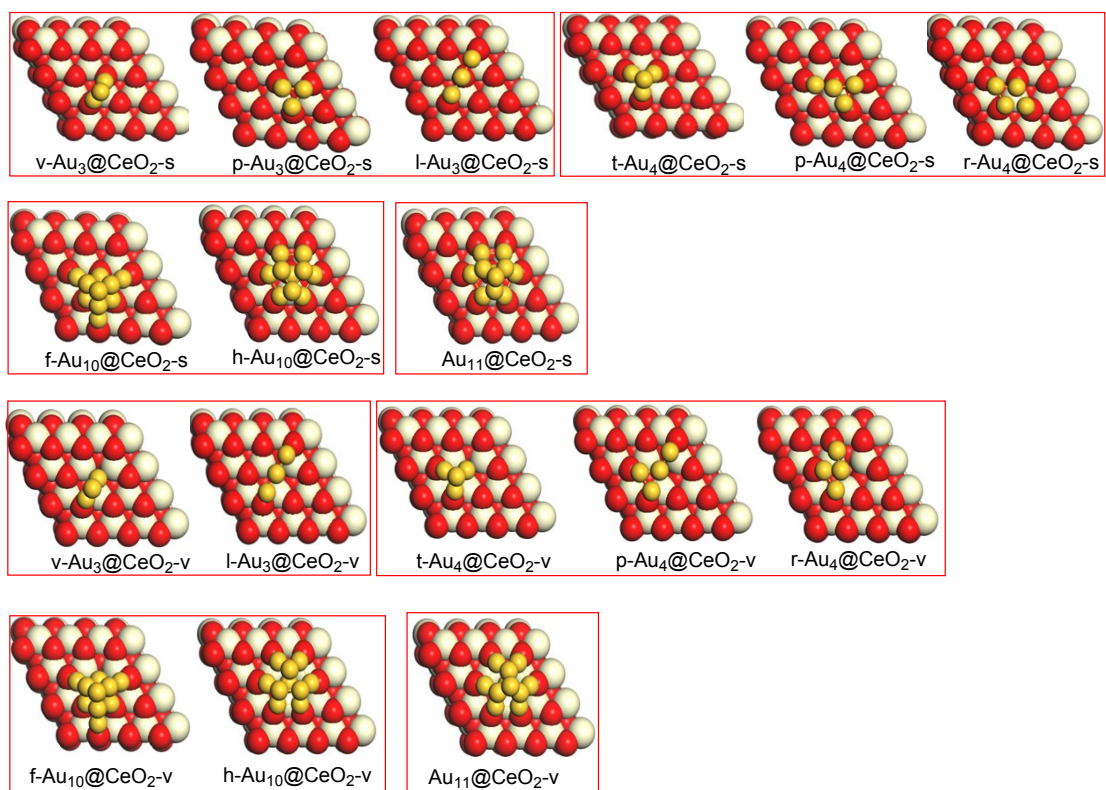

**Figure S1.** The optimized structures of Au<sub>3</sub>, Au<sub>4</sub>, Au<sub>10</sub>, and Au<sub>11</sub> supported on CeO<sub>2</sub>(111) slab.

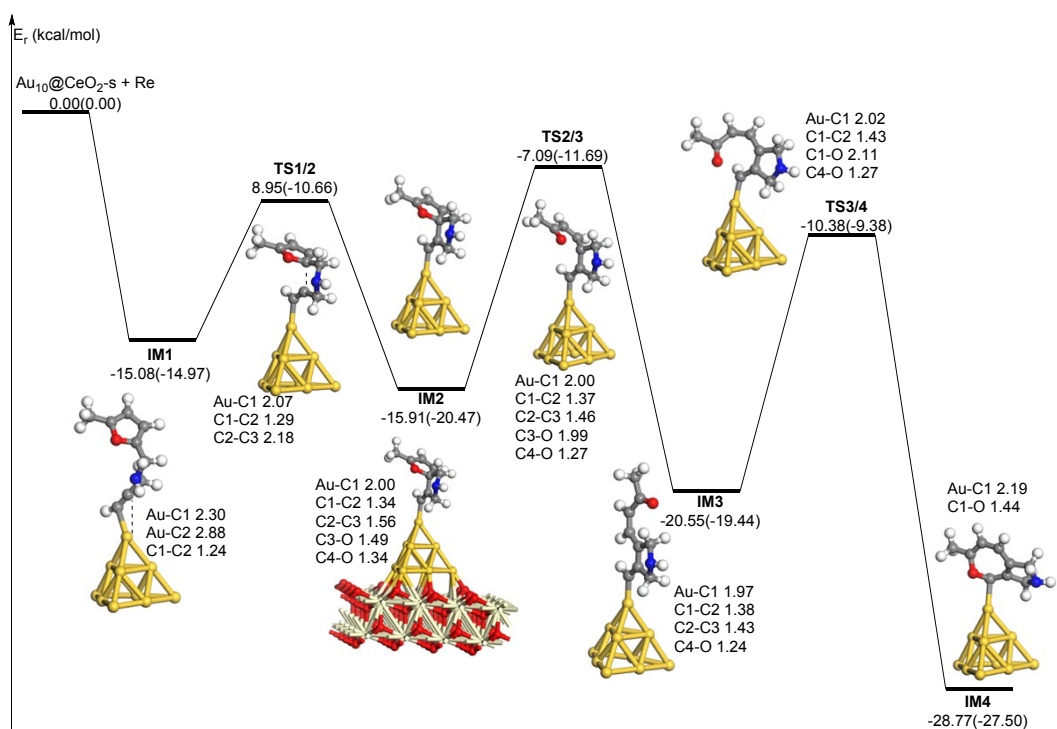

**Figure S2.** The optimized structures and energy profile of cycloisomerisation of  $\omega$ -alkynylfuran catalyzed by the atop site of  $\text{Au}_{10}/\text{CeO}_2(111)\text{-s}$ .

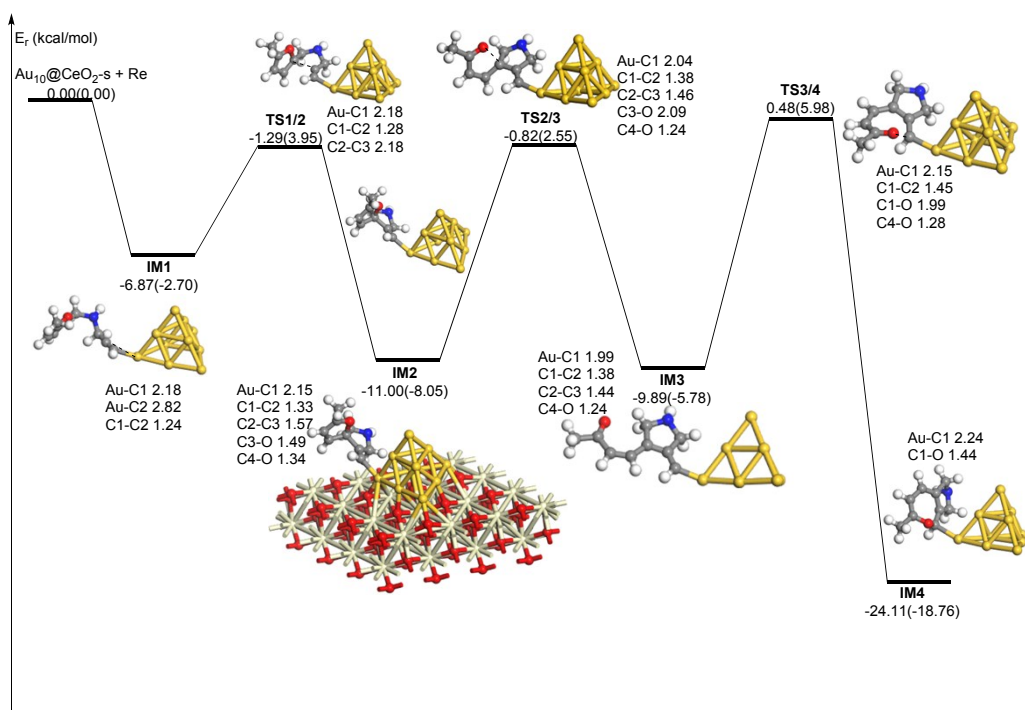

**Figure S3.** The optimized structures and energy profile of cycloisomerisation of  $\omega$ -alkynylfuran catalyzed by the interface-corner site of  $\text{Au}_{10}/\text{CeO}_2(111)\text{-s}$ .

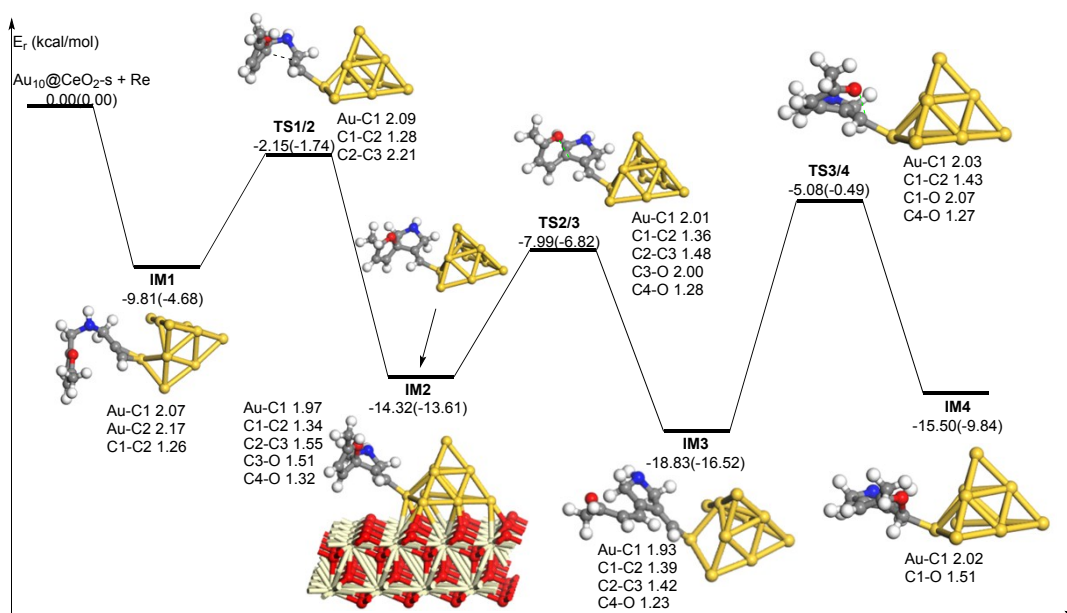

**Figure S4.** The optimized structures and energy profile of cycloisomerisation of  $\omega$ -alkynylfuran catalyzed by the interface-edge site of  $\text{Au}_{10}/\text{CeO}_2(111)\text{-s}$ .

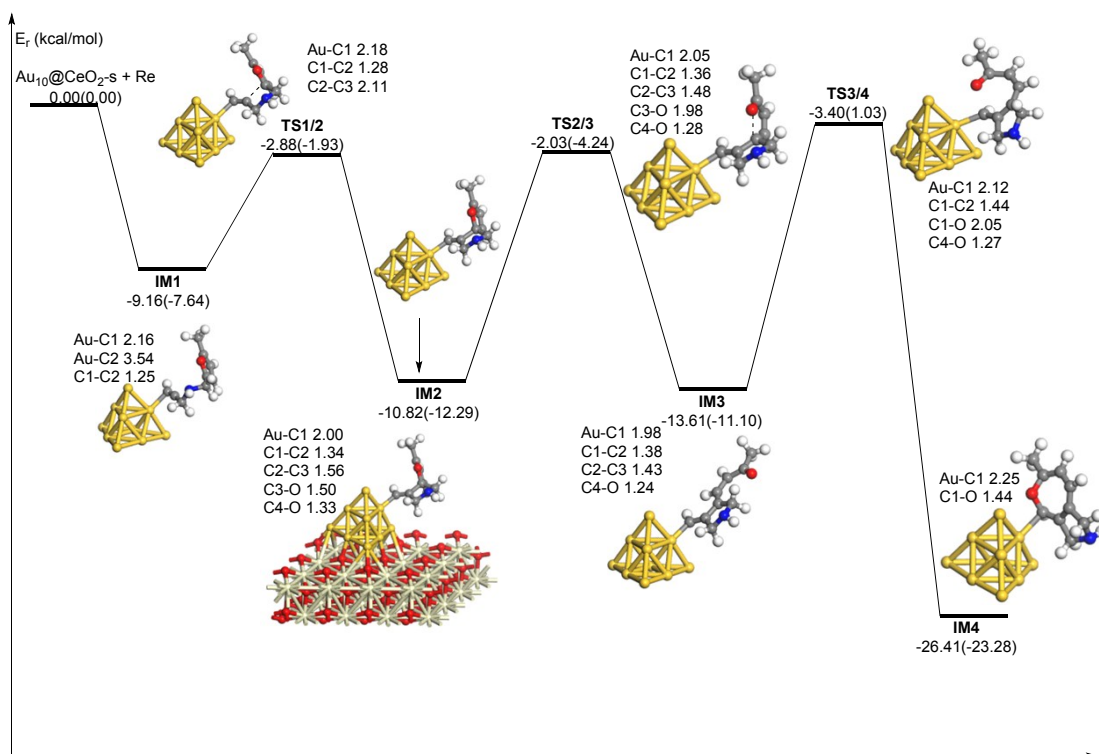

**Figure S5.** The optimized structures and energy profile of cycloisomerisation of  $\omega$ -alkynylfuran catalyzed by the edge site of  $\text{Au}_{10}/\text{CeO}_2(111)\text{-s}$ .

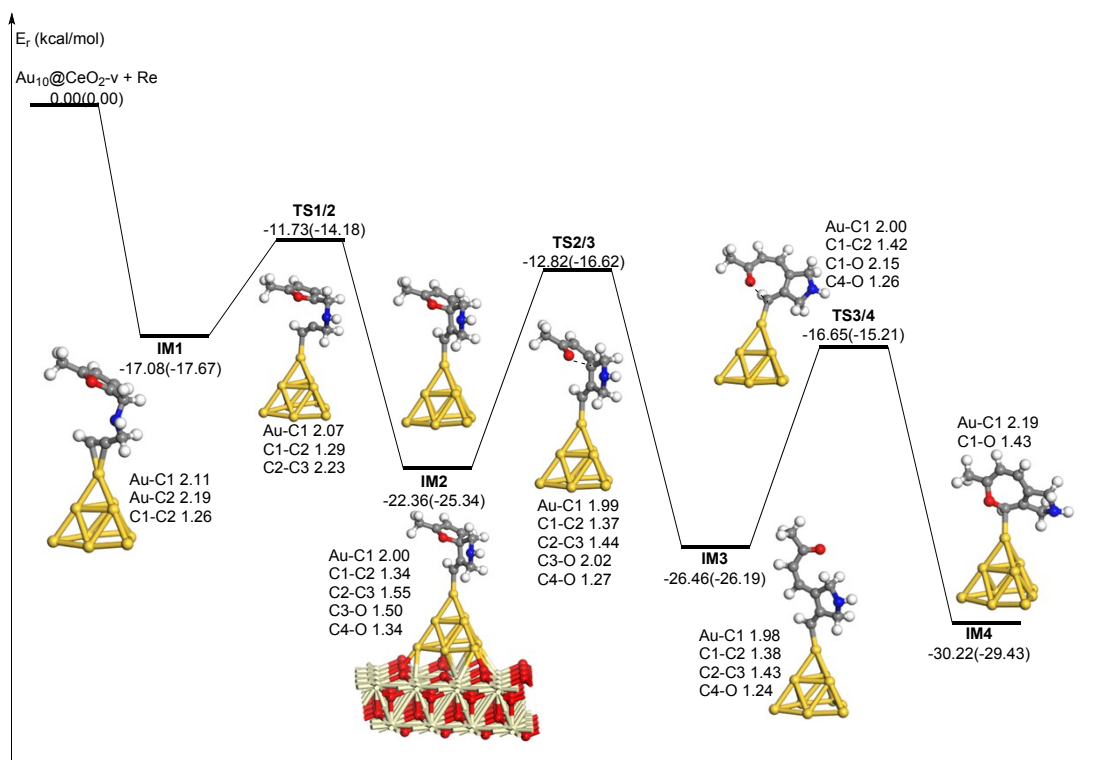

**Figure S6.** The optimized structures and energy profile of cycloisomerisation of  $\omega$ -alkynylfuran catalyzed by the atop site of  $\text{Au}_{10}/\text{CeO}_2(111)\text{-v}$ .

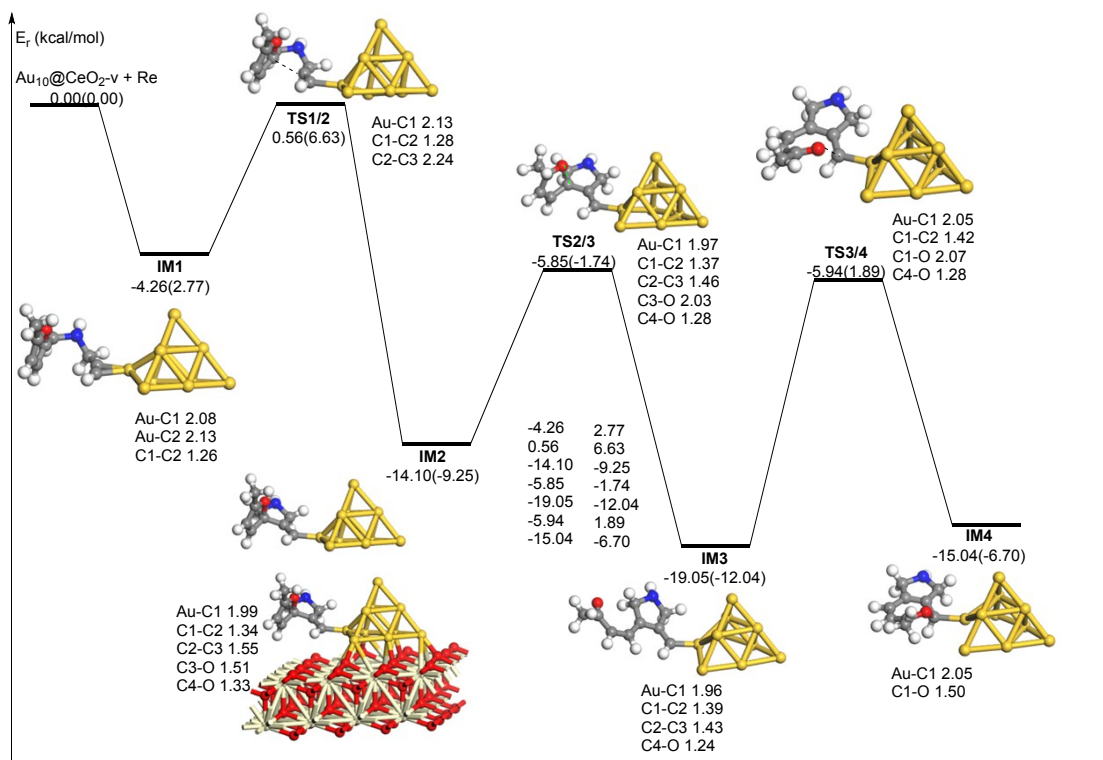

**Figure S7.** The optimized structures and energy profile of cycloisomerisation of  $\omega$ -alkynylfuran catalyzed by the interface-edge site of  $\text{Au}_{10}/\text{CeO}_2(111)\text{-v}$ .

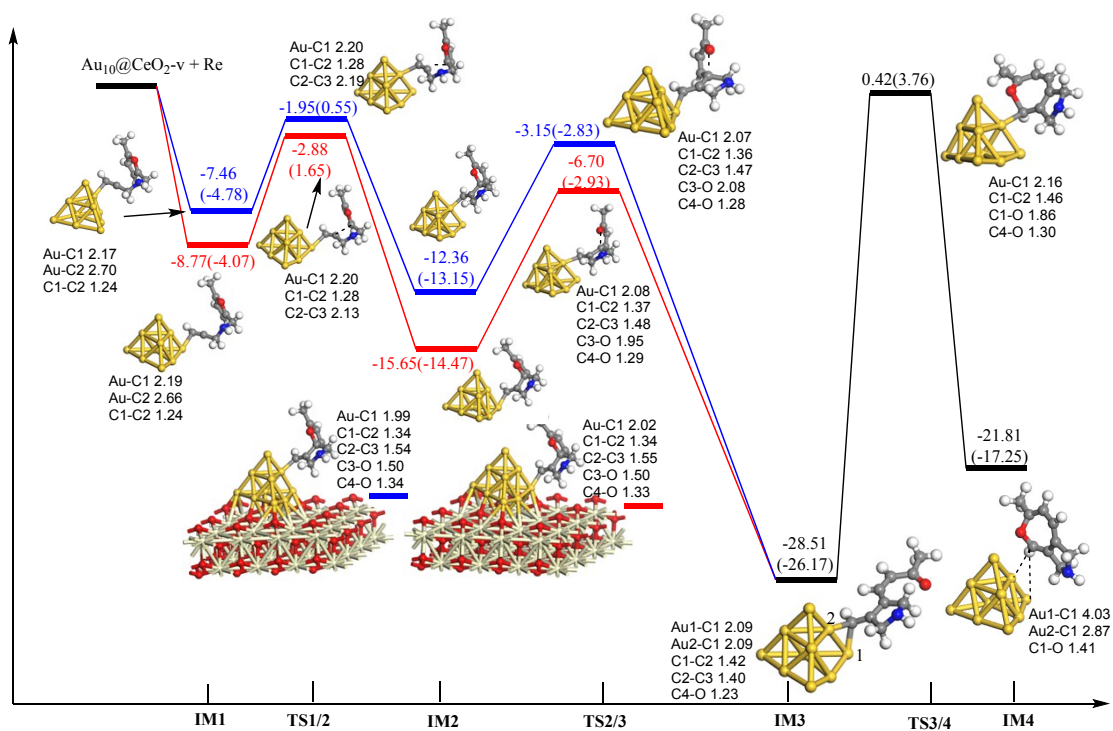

**Figure S8.** The optimized structures and energy profile of cycloisomerisation of  $\omega$ -alkynylfuran catalyzed by the interface-corner and edge sites of  $\text{Au}_{10}/\text{CeO}_2(111)\text{-v}$ .

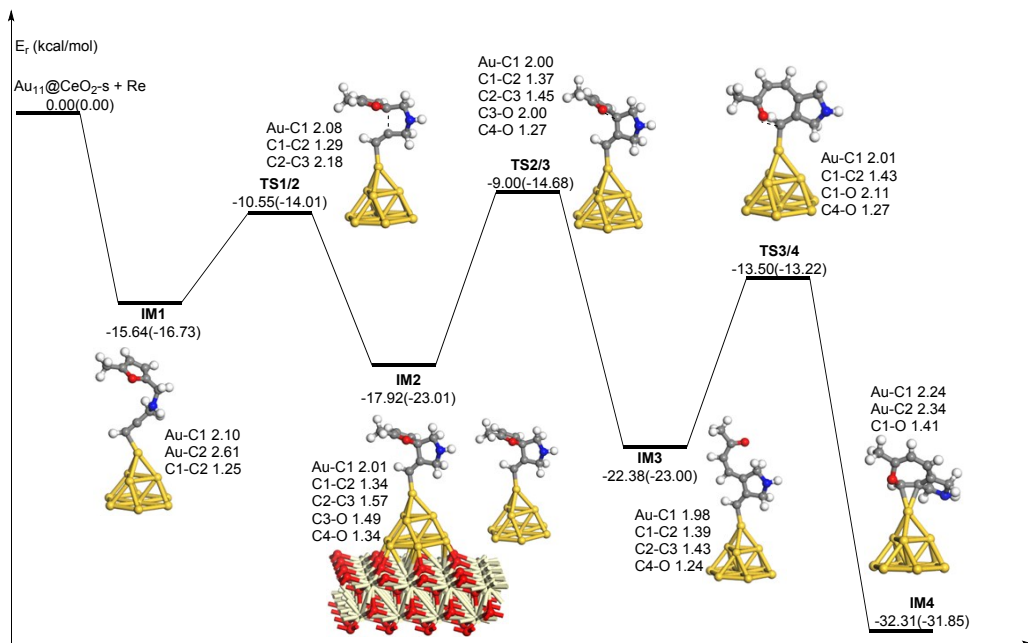

**Figure S9.** The optimized structures and energy profile of cycloisomerisation of  $\omega$ -alkynylfuran catalyzed by the atop site of  $\text{Au}_{11}/\text{CeO}_2(111)\text{-s}$ .

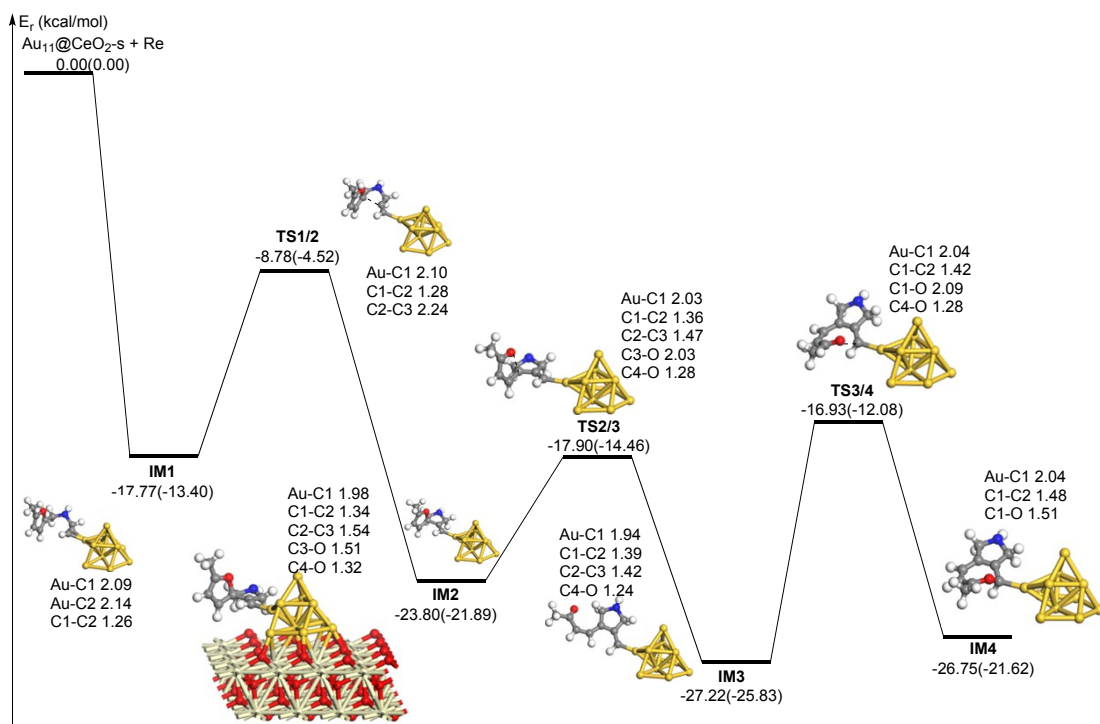

**Figure S10.** The optimized structures and energy profile of cycloisomerisation of  $\omega$ -alkynylfuran catalyzed by the interface site of  $\text{Au}_{11}/\text{CeO}_2(111)\text{-s}$ .

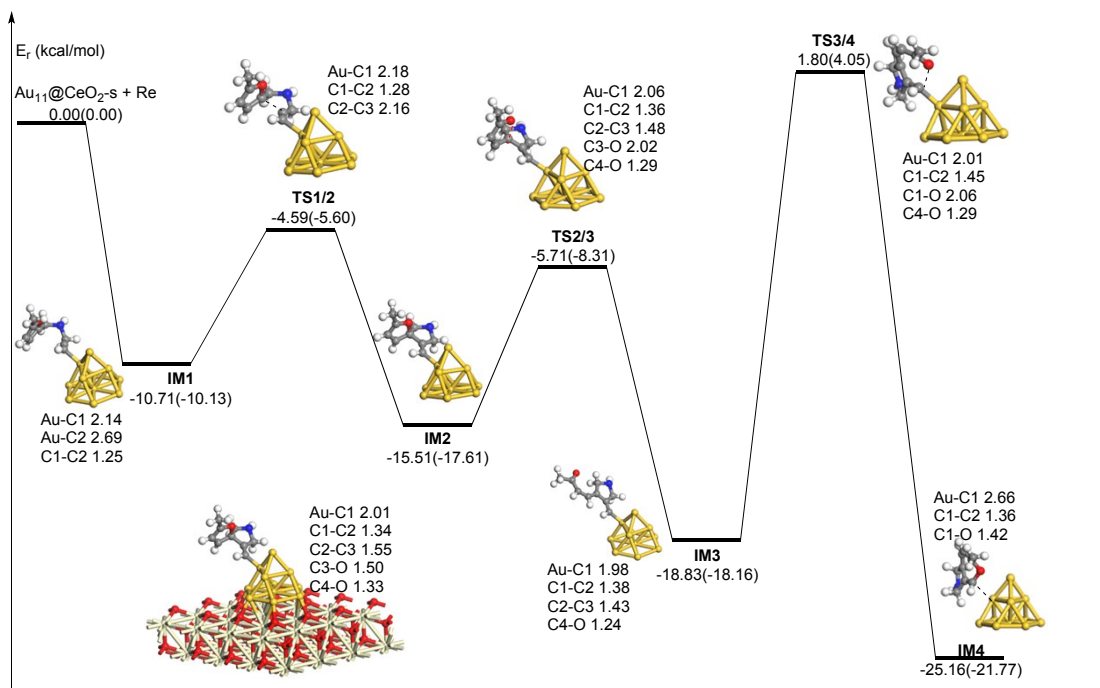

**Figure S11.** The optimized structures and energy profile of cycloisomerisation of  $\omega$ -alkynylfuran catalyzed by the edge site of  $\text{Au}_{11}/\text{CeO}_2(111)\text{-s}$ .

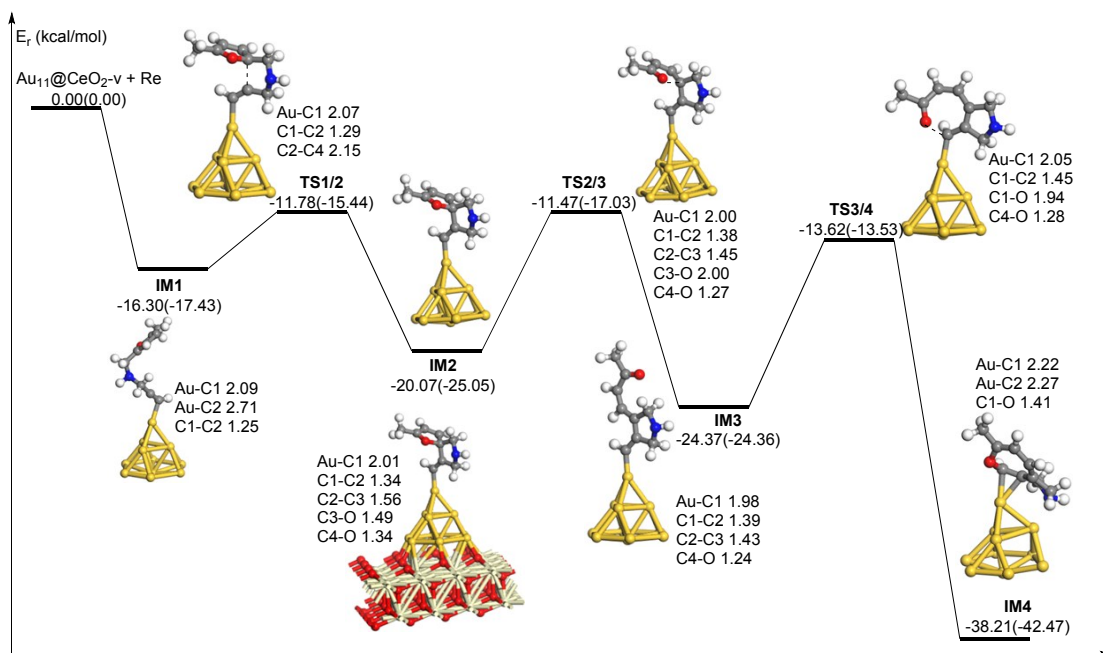

**Figure S12.** The optimized structures and energy profile of cycloisomerisation of  $\omega$ -alkynylfuran catalyzed by the atop site of  $\text{Au}_{11}/\text{CeO}_2(111)\text{-v}$ .

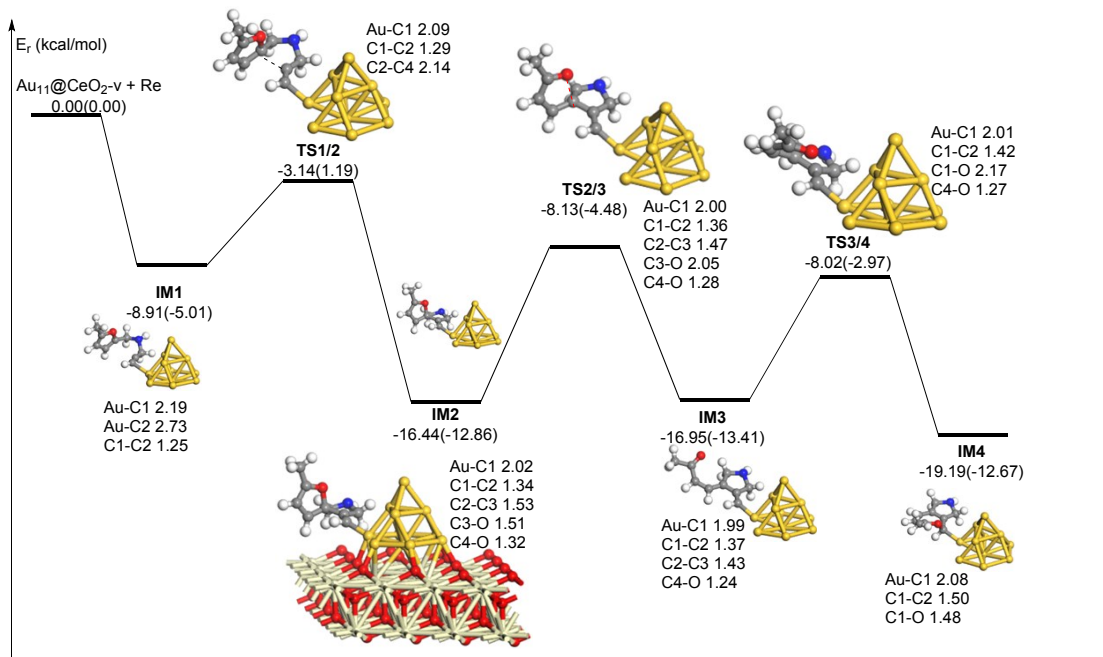

**Figure S13.** The optimized structures and energy profile of cycloisomerisation of  $\omega$ -alkynylfuran catalyzed by the interface site of  $\text{Au}_{11}/\text{CeO}_2(111)\text{-v}$ .



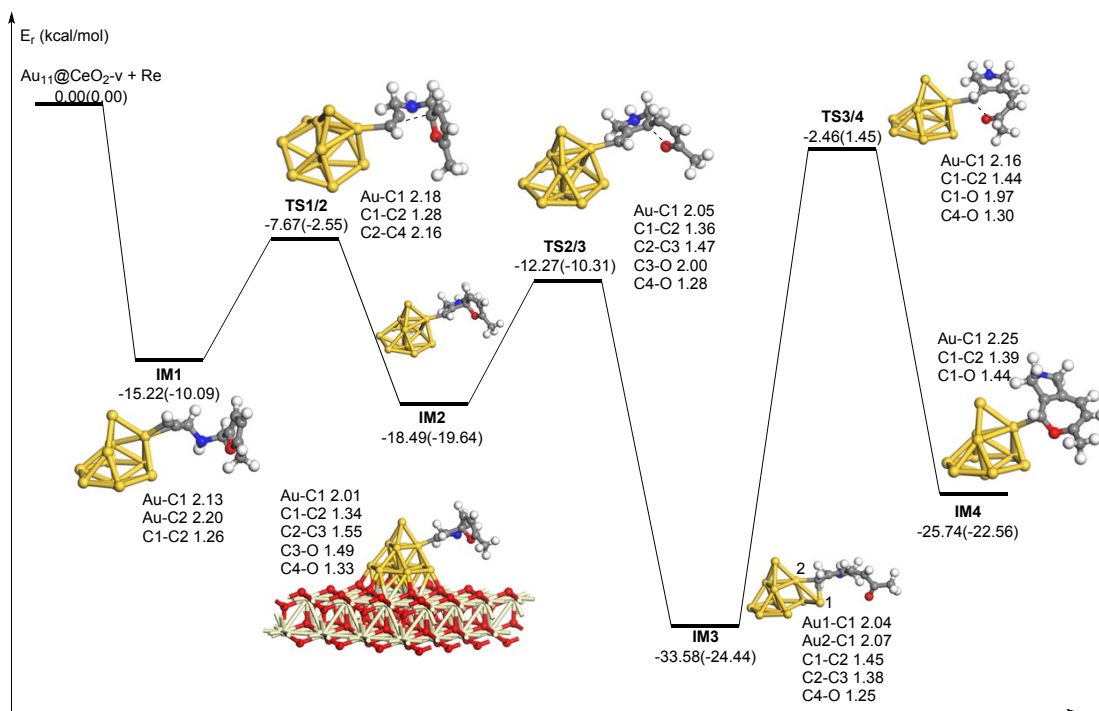

**Figure S14.** The optimized structures and energy profile of cycloisomerisation of  $\omega$ -alkynylfuran catalyzed by the edge site of  $\text{Au}_{11}/\text{CeO}_2(111)\text{-v}$ .

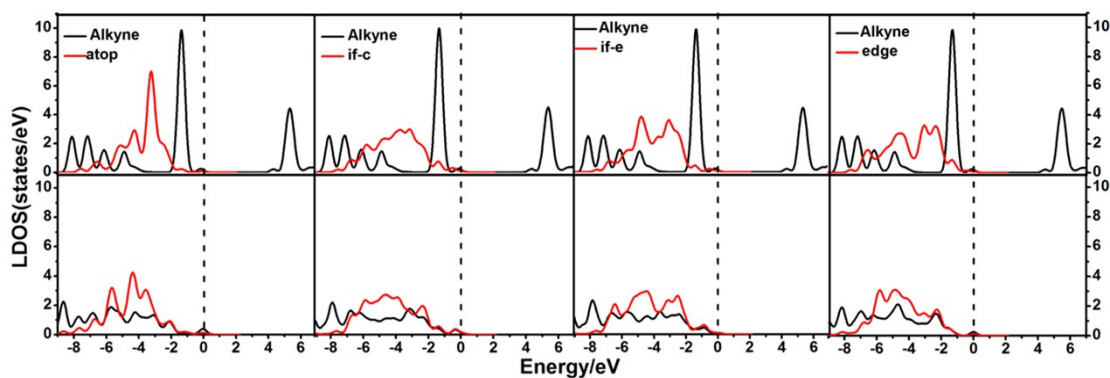

**Figure S15.** The local density of states (LDOS) projected on triplet bonds on the  $\text{Au}_{10}/\text{CeO}_2(111)\text{-sto}$  for the adsorption of the substrate at the different sites, together with the d-projected LDOS of the  $\text{Au}_{10}/\text{CeO}_2(111)\text{-v}$  of the Au atom at different sites. Free C-C triplet bond and  $\text{CeO}_2(111)$  (top), adsorption (bottom). The Fermi level is set to zero. (if-c=interface-corner, if-e=interface-edge)

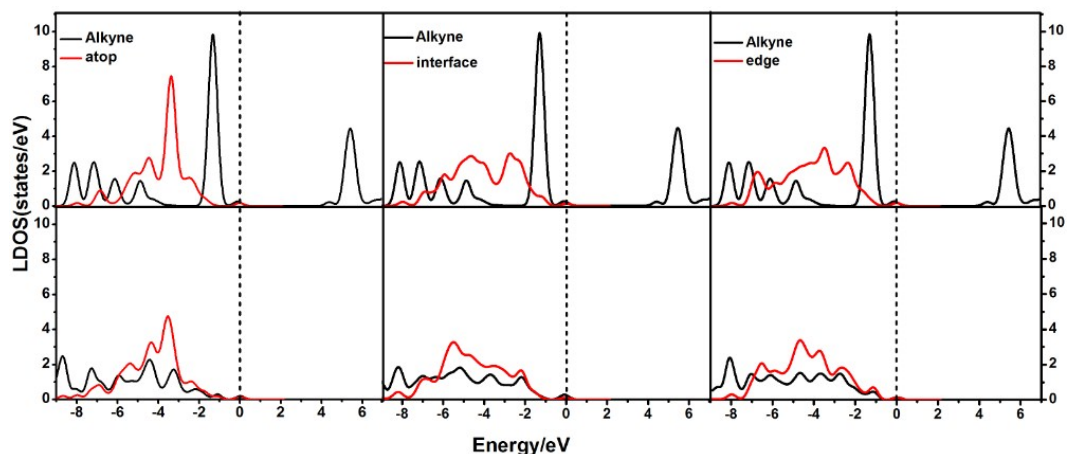

**Figure S16.** The local density of states (LDOS) projected on triplet bonds on the  $\text{Au}_{11}/\text{CeO}_2(111)$  for the adsorption of the substrate at the different sites, together with the d-projected LDOS of the  $\text{Au}_{11}/\text{CeO}_2(111)$ -s of the Au atom at different sites. Free C-C triplet bond and  $\text{CeO}_2(111)$  (top), adsorption (bottom). The Fermi level is set to zero.

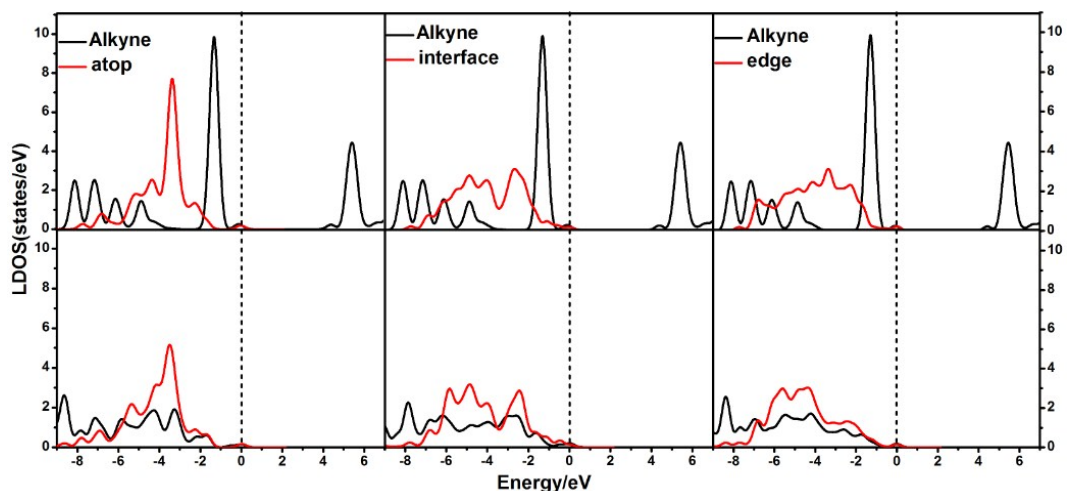

**Figure S17.** The local density of states (LDOS) projected on triplet bonds on the  $\text{Au}_{11}/\text{CeO}_2(111)$  for the adsorption of the substrate at the different sites, together with the d-projected LDOS of the  $\text{Au}_{11}/\text{CeO}_2(111)$ -v of the Au atom at different sites. Free C-C triplet bond and  $\text{CeO}_2(111)$  (top), adsorption (bottom). The Fermi level is set to zero.

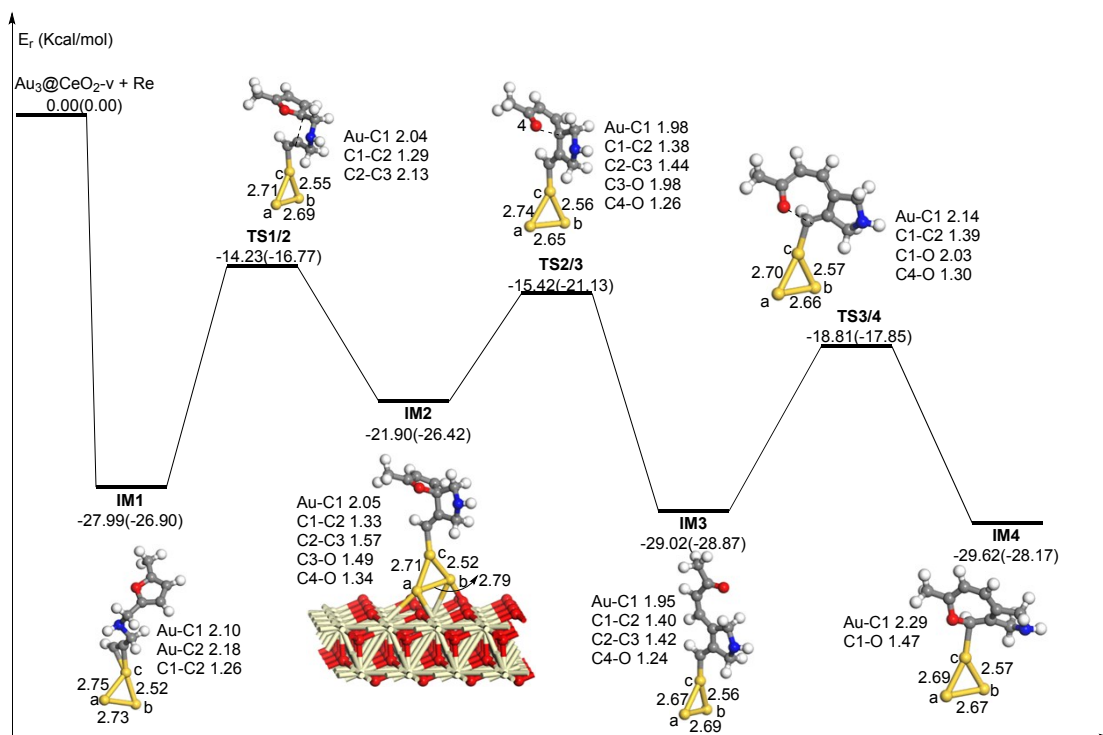

**Figure S18.** The optimized structures and energy profile of cycloisomerisation of  $\omega$ -alkynylfuran catalyzed by  $\text{Au}_3$  cluster on the stoichiometric  $\text{CeO}_2(111)(\text{Au}_3/\text{CeO}_2(111)\text{-s})$ .

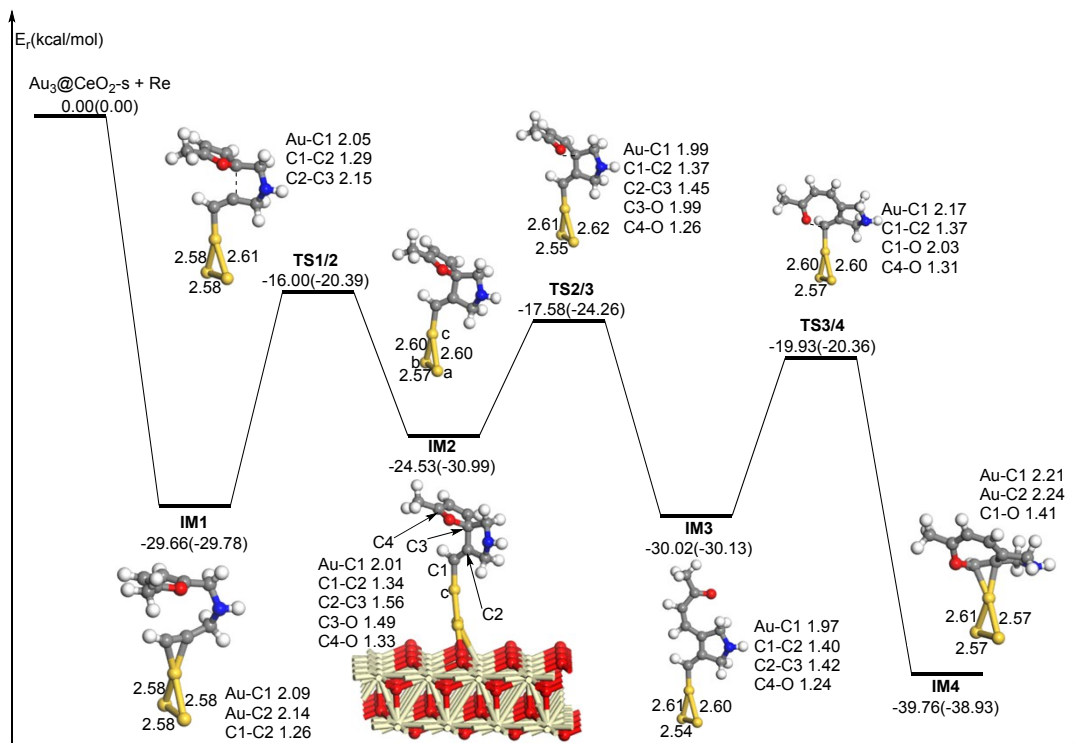

**Figure S19.** The optimized structures and energy profile of cycloisomerisation of  $\omega$ -alkynylfuran catalyzed by  $\text{Au}_3$  cluster on the vacancy  $\text{CeO}_2(111)(\text{Au}_3/\text{CeO}_2(111)\text{-v})$ .

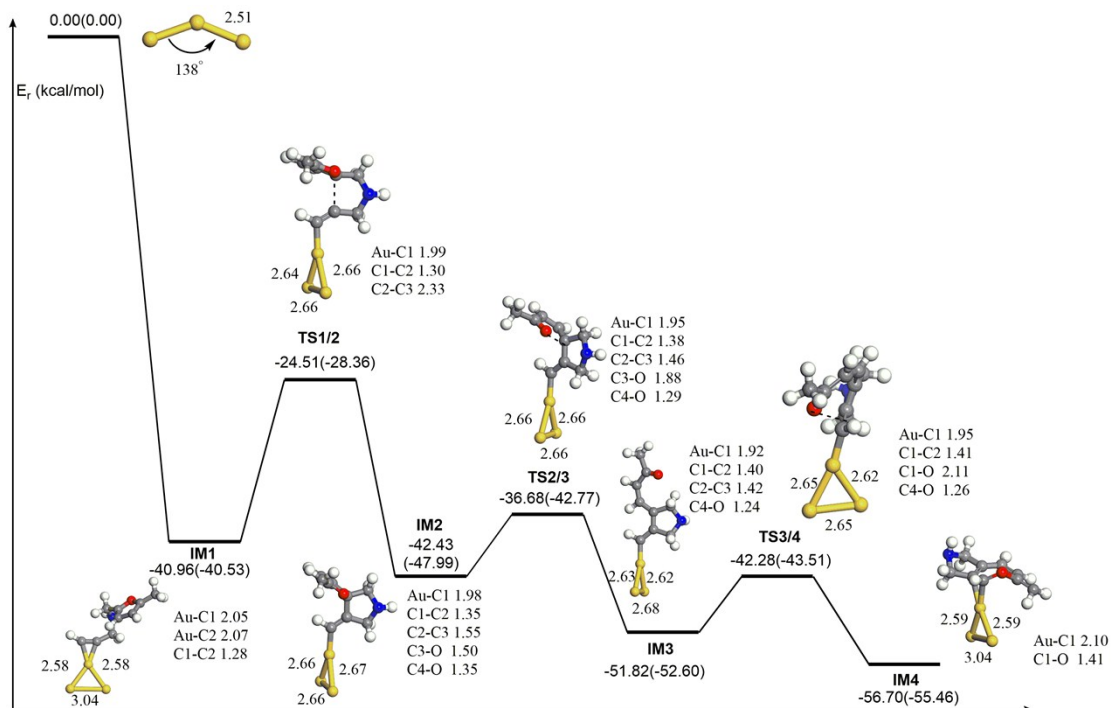

**Figure S20.** The optimized structures and energy profile of cycloisomerisation of  $\omega$ -alkynylfuran catalyzed by the free  $\text{Au}_3$  cluster.

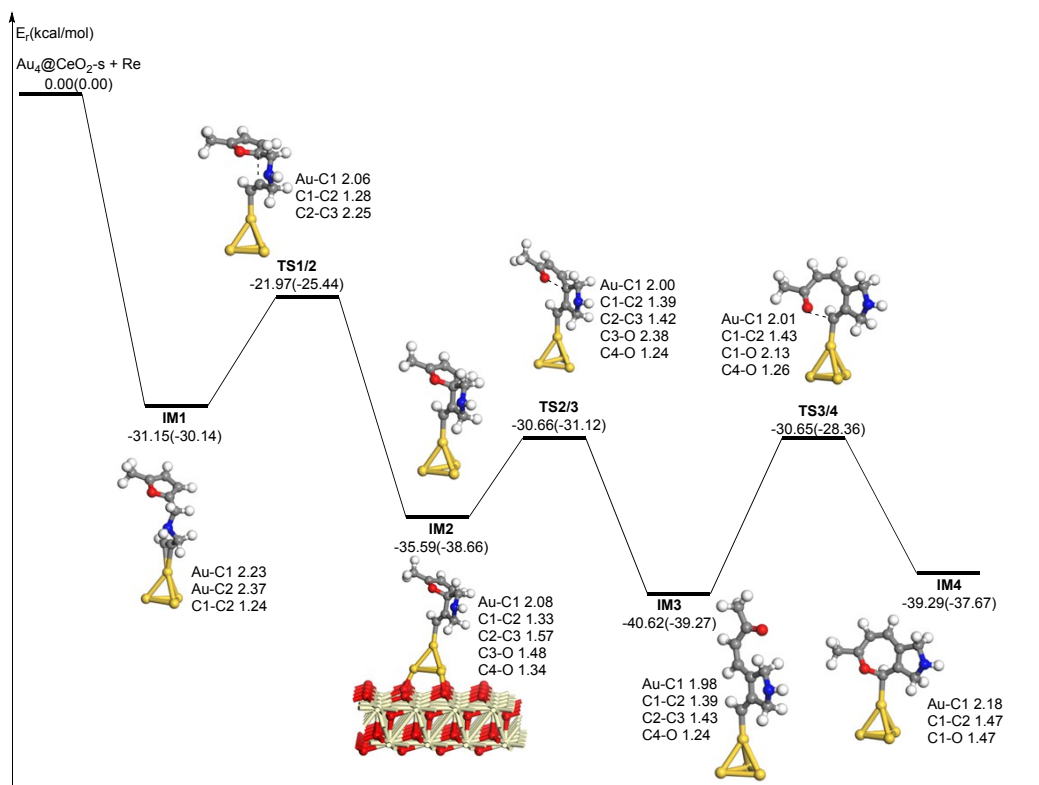

**Figure S21.** The optimized structures and energy profile of cycloisomerisation of  $\omega$ -alkynylfuran catalyzed by  $\text{Au}_4/\text{CeO}_2(111)\text{-s}$ .

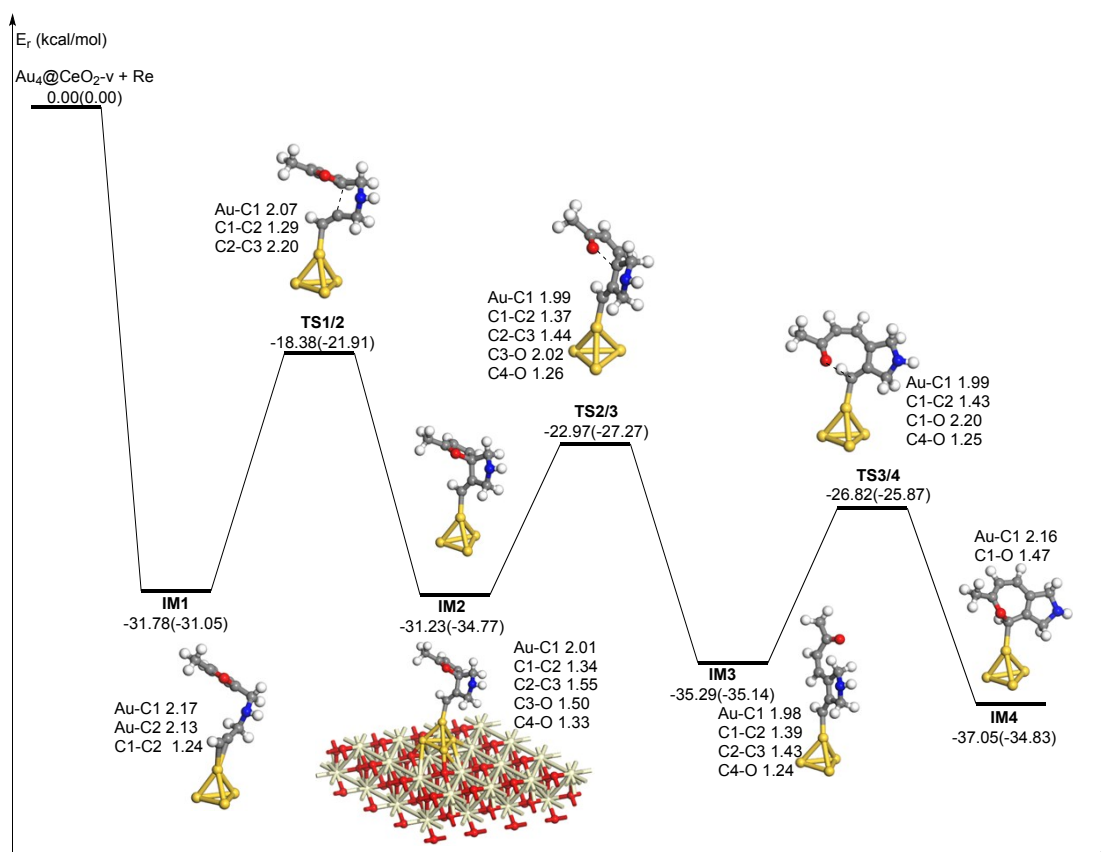

**Figure S22.** The optimized structures and energy profile of cycloisomerisation of  $\omega$ -alkynylfuran catalyzed by  $\text{Au}_4/\text{CeO}_2(111)\text{-v}$ .

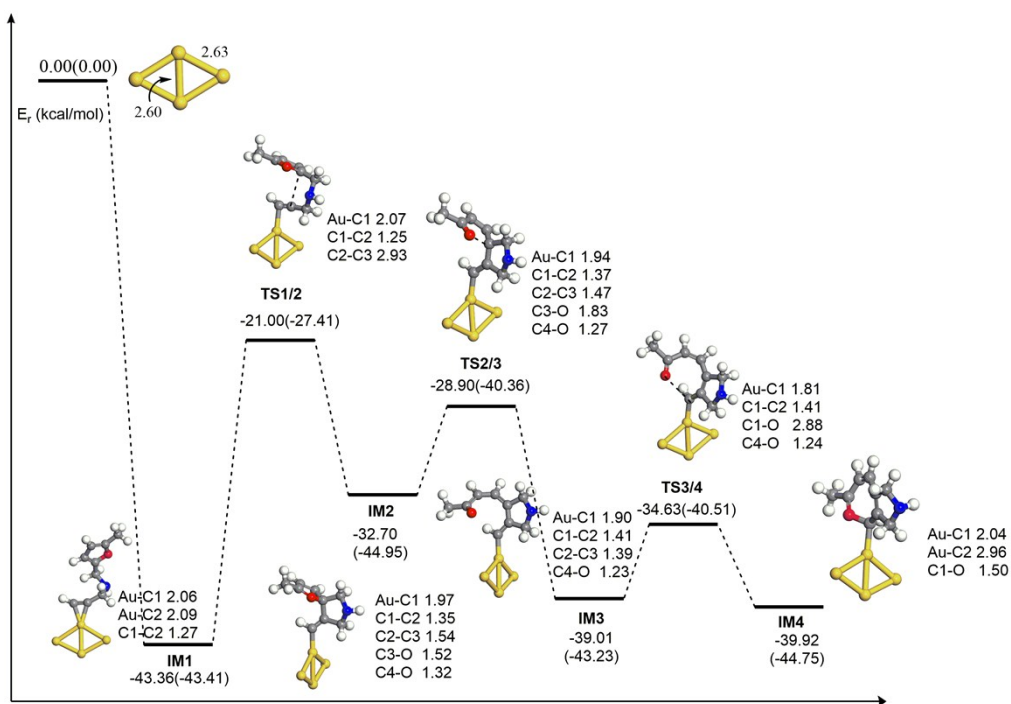

**Figure S23.** The optimized structures and energy profile of cycloisomerisation of  $\omega$ -alkynylfuran catalyzed by free  $\text{Au}_4$  cluster.

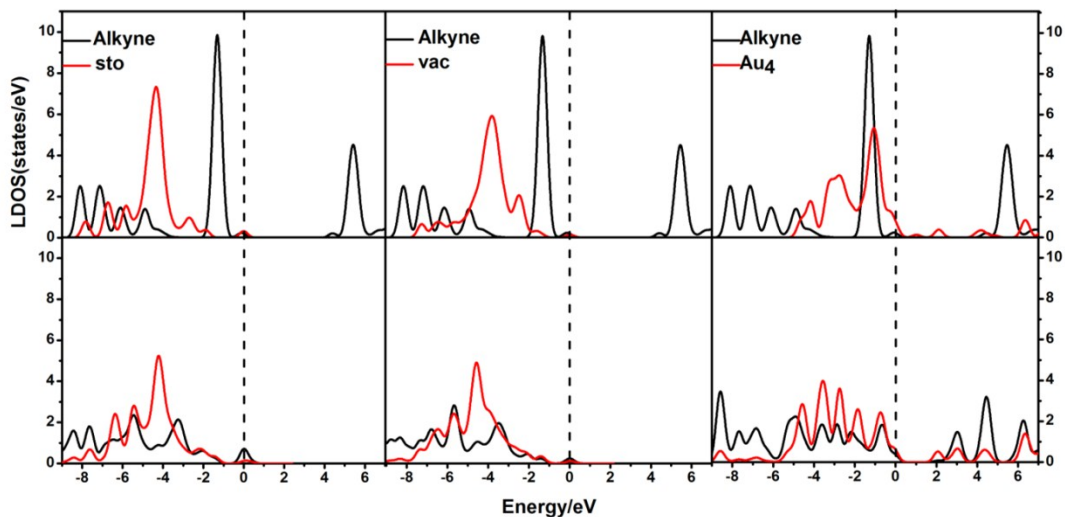

**Figure S24.** The local density of states (LDOS) projected on triplet bonds on the  $\text{Au}_4/\text{CeO}_2(111)$  for the adsorption of the substrate at the different sites, together with the d-projected LDOS of the  $\text{Au}_4/\text{CeO}_2(111)$  (stoichiometry and vacancy) of the Au atom at different sites. Free C-C triplet bond and  $\text{CeO}_2(111)$  (top), adsorption (bottom). The Fermi level is set to zero.

**Table S1.** Adsorption energy ( $\Delta E_{\text{ads}}$ , kcal/mol) of the  $\omega$ -alkynylfuran cycloisomerisation catalyzed by the  $\text{Au}_n$  and  $\text{Au}_n/\text{CeO}_2$ .

| Catalysts                                                          | $\Delta E_{\text{ads}}$ |                      |
|--------------------------------------------------------------------|-------------------------|----------------------|
|                                                                    | initial                 | <sup>a</sup> treated |
| $\text{Au}_3@ \text{CeO}_2(111)\text{-s}$                          | -29.66                  | -42.58               |
| $\text{Au}_3@ \text{CeO}_2(111)\text{-v}$                          | -27.99                  | -40.44               |
| $\text{Au}_4@ \text{CeO}_2(111)\text{-s}$                          | -31.15                  | -49.87               |
| $\text{Au}_4@ \text{CeO}_2(111)\text{-v}$                          | -31.78                  | -49.92               |
| $\text{Au}_{10}@ \text{CeO}_2(111)\text{-s}$<br>(atop)             | -15.08                  | -33.20               |
| $\text{Au}_{10}@ \text{CeO}_2(111)\text{-s}$<br>(interface-corner) | -6.87                   | -21.19               |
| $\text{Au}_{10}@ \text{CeO}_2(111)\text{-s}$<br>(interface-edge)   | -9.81                   | -14.51               |
| $\text{Au}_{10}@ \text{CeO}_2(111)\text{-s}$<br>(edge)             | -9.16                   | -18.16               |
| $\text{Au}_{10}@ \text{CeO}_2(111)\text{-v}$<br>(atop)             | -17.08                  | -36.31               |
| $\text{Au}_{10}@ \text{CeO}_2(111)\text{-v}$<br>(interface-corner) | -8.77                   | -21.08               |
| $\text{Au}_{10}@ \text{CeO}_2(111)\text{-v}$<br>(interface-edge)   | -4.26                   | -28.63               |
| $\text{Au}_{10}@ \text{CeO}_2(111)\text{-v}$<br>(edge)             | -7.46                   | -17.17               |
| $\text{Au}_{11}@ \text{CeO}_2(111)\text{-s}$<br>(atop)             | -15.64                  | -27.38               |
| $\text{Au}_{11}@ \text{CeO}_2(111)\text{-s}$<br>(interface)        | -17.77                  | -34.43               |
| $\text{Au}_{11}@ \text{CeO}_2(111)\text{-s}$<br>(edge)             | -10.71                  | -19.97               |
| $\text{Au}_{11}@ \text{CeO}_2(111)\text{-v}$<br>(atop)             | -16.30                  | -28.56               |
| $\text{Au}_{11}@ \text{CeO}_2(111)\text{-v}$<br>(interface)        | -8.91                   | -19.10               |
| $\text{Au}_{11}@ \text{CeO}_2(111)\text{-v}$<br>(edge)             | -15.22                  | -34.26               |

<sup>a</sup> The corresponding values are obtained via removing the  $\text{CeO}_2(111)$  surface.

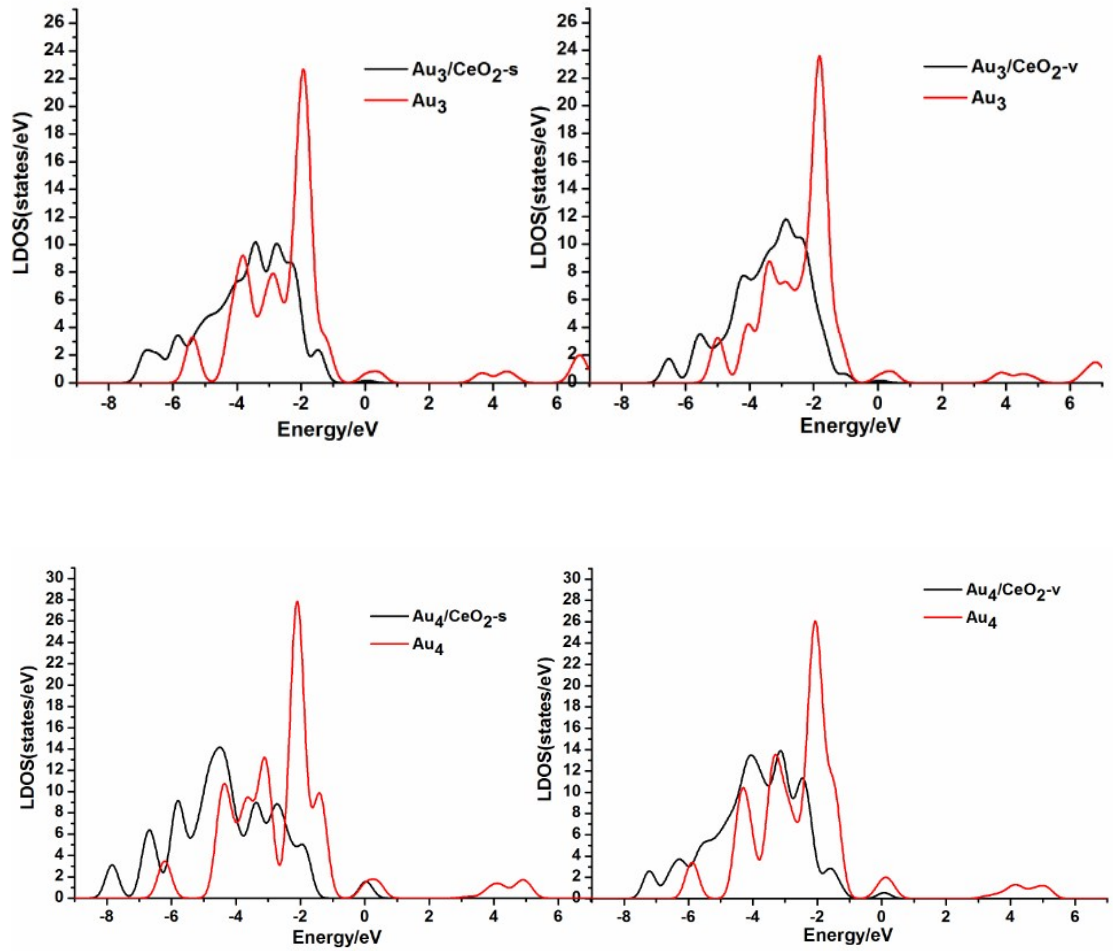

**Figure S25.** The local density of states (LDOS) projected on the d-projected LDOS of the Au<sub>3</sub>/Au<sub>4</sub>/CeO<sub>2</sub>(111) (stoichiometry and vacancy) of the Au atom and those of free Au<sub>3</sub> and Au<sub>4</sub> clusters which obtained via removing the CeO<sub>2</sub>(111) surface.



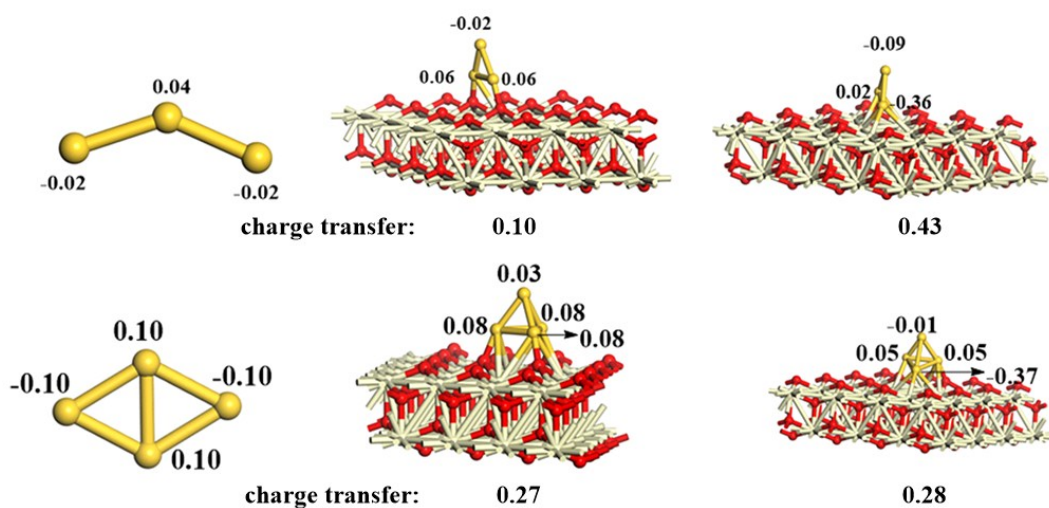

**Figure S26.** The Mulliken charges of Au atoms ( $|e|$ ) for the free Au<sub>3</sub>/Au<sub>4</sub> cluster (left), Au<sub>3</sub>/Au<sub>4</sub>/CeO<sub>2</sub> (stoichiometric, middle) and Au<sub>3</sub>/Au<sub>4</sub>/CeO<sub>2</sub> (stoichiometric, right).
